# Supplementary material for: Preoperative chemoradiotherapy for rectal cancer: the sensitizer role of the association between miR-375 and c-Myc
Source: PubMed Central journal article supplement (PMC5669890; doi:10.18632/oncotarget.19393), 2017-07-19
Supplement: oncotarget-08-82294-s001.pdf [file oncotarget-08-82294-s001.pdf]

## Preoperative chemoradiotherapy for rectal cancer: the sensitizer role of the association between miR-375 and c-Myc

### SUPPLEMENTARY MATERIALS

Supplementary Table 1: Characteristics of the patients with rectal tumor.

See Supplementary File 1

Supplementary Table 2: Patient characteristics stratified by response to treatment.

See Supplementary File 2

Supplementary Table 3: 82 miRNAs manually annotated in database as related to c-Myc gene and/or identified in the literature. 29 candidate miRNAs described in more than one database or article are highlighted in grey.

See Supplementary File 3

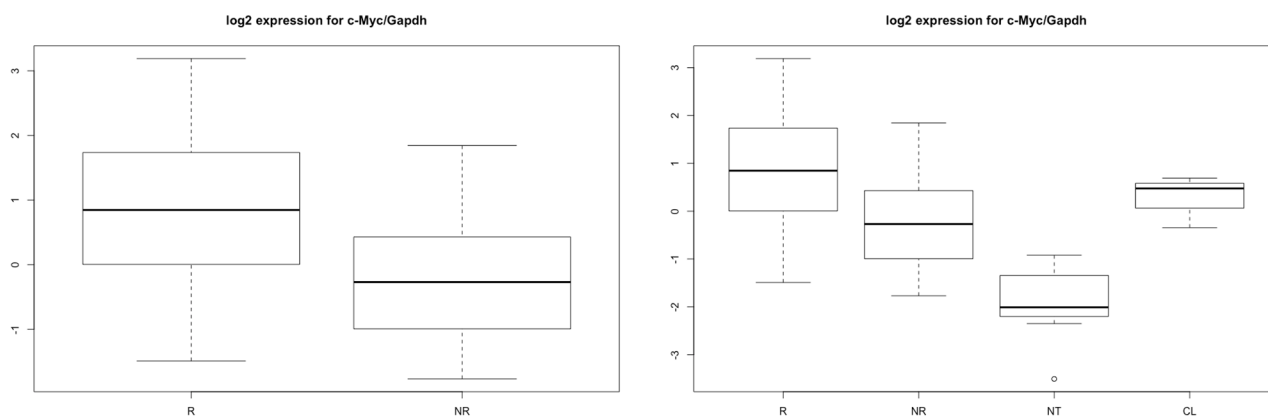

**Supplementary Figure 1: c-Myc mRNA is a potential biomarker of response to treatment in LARC.** Box plots representing expression values of gene c-Myc by real-time RT-PCR in responders (R) and non-responders (NR). Boxes represent quartiles, the median is represented by a black line within the box, and circles represent atypical values (1.5- to 3-fold the length of the box). Significant differences in the expression of c-Myc were found among the subgroups. NT: non-tumor samples; CL: cell lines (SW480, SW620 and SW837).

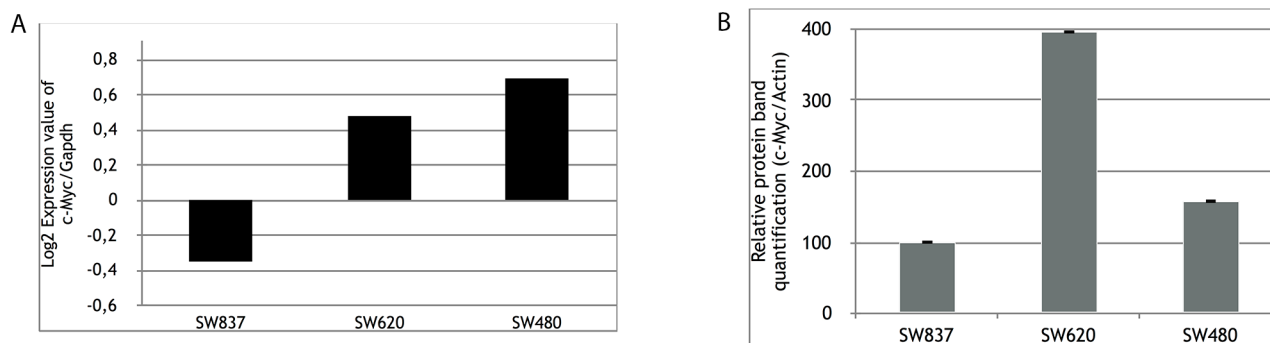

**Supplementary Figure 2: c-Myc mRNA and protein expression levels in SW480, SW620, and SW837.** (A) TaqMan mRNA assay for c-Myc. c-Myc expression was normalized using Gapdh expression levels. SW837 cell line expressed the lowest c-Myc levels; (B) c-Myc protein by Western blot. Relative protein band quantification (c-Myc/Actin) was performed by optical density scanning.

**Supplementary Table 4: Determination of lethal concentration (LC50) of 5-FU in S480, SW620, and SW837 cell lines**

|       | MTT 48 h     | MTT 72 h     |
|-------|--------------|--------------|
| SW480 | 0.95 $\mu$ M | 1.16 $\mu$ M |
| SW620 | 0.76 $\mu$ M | 1.15 $\mu$ M |
| SW837 | >160 $\mu$ M | 80 $\mu$ M   |

Cells were incubated with the drug for 48 h or 72 h. Viability was determined by a MTT assay to detect metabolic activity. Each sample at each concentration was run in quadruplicate and was normalized to control samples.

**Supplementary Table 5: Taqman probes and primers used for the qRT-PCR analysis**

| Target                        |                     | Sequence                                                     | Assay ID                          |
|-------------------------------|---------------------|--------------------------------------------------------------|-----------------------------------|
|                               |                     |                                                              | Thermo Fisher Scientific          |
| mRNA                          | c-Myc               |                                                              | Hs00153408_m1                     |
|                               | Gapdh               |                                                              | Hs02758991_g1                     |
| <b>miRNA database results</b> |                     |                                                              |                                   |
| miRNA                         | hsa-miR-21-5p       | UAGCUUAUCAGACUGAUGUUGA                                       | 477975_mir                        |
|                               | hsa-miR-125         | UCCCUGAGACCUAACUUGUGA                                        | 477885_mir                        |
|                               | hsa-miR-143-3p      | UGAGAUGAAGCACUGUAGCUC                                        | 477912_mir                        |
|                               | hsa-miR-200c-3P     | UAAUACUGCCGGGUAUGAUGGA                                       | 478351_mir                        |
|                               | hsa-miR-215-5p      | AUGACCUAUGAAUUGACAGAC                                        | 478516_mir                        |
|                               | let7c-5e            | UGAGGUAGGAGGUUGUAUAGUU                                       | 478579_mir                        |
| <b>miRNA array results</b>    |                     |                                                              |                                   |
| miRNA                         | miR-18a             | UAAGGUGCAUCUAGUGCAGAUAG                                      | 478551_mir                        |
|                               | miR-30b             | UGUAAACAUCUACACUCAGCU                                        | 478007_mir                        |
|                               | miR-145             | GUCCAGUUUCCCAGGAAUCCCU                                       | 477916_mir                        |
|                               | miR-148a            | UCAGUGCACUACAGAACUUUGU                                       | 477814_mir                        |
|                               | miR-375             | UUUGUUCGUUCGGCUCGCGUGA                                       | 478074_mir                        |
|                               | miR-451             | AAACCGUUACCAUUCUGAGUU                                        | 478107_mir                        |
|                               | miR-519b-3p         | AAAGUGCAUCCUUUAGAGGUU                                        | 479333_mir                        |
|                               | miR-650             | AGGAGGCAGCGCUCUCAGGAC                                        | 479129_mir                        |
|                               | miR-1183            | CACUGUAGGUGAUGGUGAGUGGGCA                                    | 477870_mir                        |
|                               | miR-1233            | UGAGCCCUGUCCUCCCGCAG                                         | 477877_mir                        |
|                               | miR-1243            | AACUGGAUCAUUUAGGAGUG                                         | 478650_mir                        |
|                               | let-7f              | CUAUACAAUCUAUUGCCUCCU                                        | 77801_mir                         |
|                               | <b>Housekeeping</b> |                                                              |                                   |
| miRNA                         | Snord44             | CCTGGATGATGATAAGCAAATGCTGACTGAACATGAAGGTCTTAATTAGCTCTAACTGAC | CSAAYWT Bach<br>id:w1605853025000 |

Supplementary Table 6: Characteristics of tumor cell lines based on online databases

|                       | SW837 (CCL235)                                                                         | SW 480 (CCL228)                                                                               | SW620 (CCL 227)                                                                               |
|-----------------------|----------------------------------------------------------------------------------------|-----------------------------------------------------------------------------------------------|-----------------------------------------------------------------------------------------------|
| <b>Description</b>    | Rectal adenocarcinoma (stage IV)                                                       | Colorectal adenocarcinoma (Duke's type B)                                                     | Rectal adenocarcinoma (Duke's type C)                                                         |
| <b>Tissue</b>         | Human rectal                                                                           | Human colon                                                                                   | Human colon but from a lymphatic metastasis                                                   |
| <b>Morphology</b>     | Adhesive epithelial cell                                                               | Adhesive epithelial cell                                                                      | Adhesive epithelial cell                                                                      |
| <b>c-Myc mutation</b> | p.V92I; G->A* <sup>o^</sup><br>Substitution - Missense                                 | No* <sup>o</sup>                                                                              | No* <sup>o</sup>                                                                              |
| <b>p53 mutation</b>   | p.R248W; G->A* p.R248W;<br>C->T <sup>o</sup><br>Substitution - Missense                | p.R273H; c.818 G>A <sup>o</sup><br>p.P309S; c.925 C>T <sup>o</sup><br>Substitution - Missense | p.R273H; c.818 G>A <sup>o</sup><br>p.P309S; c.925 C>T <sup>o</sup><br>Substitution - Missense |
| <b>k-Ras mutation</b> | p.G12C; C->A* p.G12C;<br>G->T <sup>o</sup><br>Substitution - Missense                  | p.G12V; C->A* <sup>o</sup><br>Substitution - Missense                                         | p.G12V; C->A* <sup>o</sup><br>Substitution - Missense                                         |
| <b>Apc mutation</b>   | p.R213; C->T* <sup>o^</sup> p.R1450;<br>C->T* <sup>o^</sup><br>Substitution - Nonsense | p.Q1338; C->T* <sup>o</sup><br>Substitution - Nonsense                                        | p.Q1338; C->T* <sup>o</sup><br>Substitution - Nonsense                                        |

\* Cancer Cell Line Encyclopedia (CCLE), <https://www.broadinstitute.org/ccle/home>

<sup>o</sup> Catalog of Somatic Mutations in Cancer (COSMIC), <http://cancer.sanger.ac.uk/cosmicous>

<sup>o^</sup>Heterozygous mutation

|                       | SW837 (CCL235) | SW 480 (CCL228) | SW620 (CCL 227) |
|-----------------------|----------------|-----------------|-----------------|
| <b>c-Myc mutation</b> | V92II          | Asp258Ser       | Asp258Ser       |

We amplified genomic c-Myc DNA from cell lines using specific primers for each exon. PCR was performed in a 20 mL final volume reaction containing: 1 µL of DNA (100 µM), 2 µL of Buffer, 12.2 µL of water, 2 µL of Magnesium, 0.4 µL of dNTPs (10 mM each), 1 µL of each primer, and 0.2 µL of Taq polymerase under the following cycling conditions: 40 cycles of 94°C for 30 s, 55°C for 30 s and 72°C for 30 s. PCR products were then analyzed by automatic sequencing (3700 Abi Prism).
